# Supplementary material for: Enhanced fluoride removal by loading Al/Zr onto carboxymethyl starch sodium: synergistic interactions between Al and Zr
Source: Royal Society of Chemistry journal article supplement (doi:10.1039/c5ra18167d), 2015-01-01
Supplement: c5ra18167d1.pdf [file c5ra18167d1.pdf]

**Enhanced fluoride removal by loading Al/Zr onto carboxymethyl  
starch sodium: synergistic interactions between Al and Zr**

Table S1 Calculated  $R_L$  values based on the Langmuir isotherm model.

| $C_0$ (mg/L) | $R_L$  |        |           |
|--------------|--------|--------|-----------|
|              | CMS–Al | CMS–Zr | CMS–Al–Zr |
| 5            | 0.9074 | 0.8946 | 0.9114    |
| 10           | 0.8305 | 0.8093 | 0.8372    |
| 20           | 0.7101 | 0.6797 | 0.7200    |
| 30           | 0.6202 | 0.5859 | 0.6316    |
| 40           | 0.5505 | 0.5148 | 0.5626    |
| 60           | 0.4495 | 0.4143 | 0.4616    |
| 80           | 0.3798 | 0.3466 | 0.3914    |
| 100          | 0.3288 | 0.2980 | 0.3397    |
| 150          | 0.2462 | 0.2206 | 0.2554    |
| 200          | 0.1968 | 0.1751 | 0.2046    |

Table S2 Comparison of fluoride adsorption capacity determined in this study with those reported for other carbohydrate polymer-based adsorbents.

| Adsorbent                                                | q <sup>0</sup> (mg/g) | pH      | Contact time | Reference |
|----------------------------------------------------------|-----------------------|---------|--------------|-----------|
| Zr loaded cross-linked chitosan composite                | 48.26                 | 6       | 40 min       | 1         |
| Linked-CMC-La                                            | 42.66                 | 3       | 24 h         | 2         |
| Carboxymethyl cellulose loaded with Zr                   | 38.46                 | 4       | 4 h          | 3         |
| Porous zirconium alginate beads                          | 32.80                 | 2       | 20 h         | 4         |
| Al-doping chitosan-Fe(III) hydrogel                      | 31.16                 | 5       | 30 min       | 5         |
| Chitosan/MMT/ZrO <sub>2</sub> nanocomposite              | 23                    | 4       | 60 min       | 6         |
| Fe-impregnated chitosan                                  | 20.75                 | –       | 24 h         |           |
| β-Cyclodextrin modified zirconium oxide                  | 20.6                  | 7       | 60 min       | 7         |
| Alginate based anion exchanger from <i>Ulva japonica</i> | 18.1                  | 5       | 24 h         | 8         |
| Dendrimer like chitosan beads                            | 17.47                 | 7       | 80 min       | 9         |
| Titanium hydrate based on chitosan template              | 16.12                 | 4-9     | 3 h          | 10        |
| Alginate-zirconium biopolymeric complex                  | 9.57                  | 3       | 25 min       | 11        |
| Hydrous ferric oxide dropped alginate beads              | 8.9                   | 7       | 4 h          | 12        |
| Zr enabled in carboxylated alginic acid                  | 6.58                  | 3       | 30 min       | 13        |
| Zirconium impregnated cellulose                          | 4.95                  | 4.5-5.5 | 50 min       | 14        |
| Chitosan/bentonite composite                             | 2.95                  | 7       | –            | 15        |
| Alginate bioencapsulated nano-hydroxyapatite composite   | 0.123                 | 3       | 30 min       | 16        |
| Cerium loaded cellulose nanocomposite bead               | 0.095                 | 3       | 1 h          | 17        |
| CMS-Zr                                                   | 40.23                 | 3       | 60 min       | This work |
| CMS-Al                                                   | 51.44                 | 5-10    | 60 min       | This work |
| CMS-Al-Zr                                                | 60.61                 | 4-10    | 60 min       | This work |

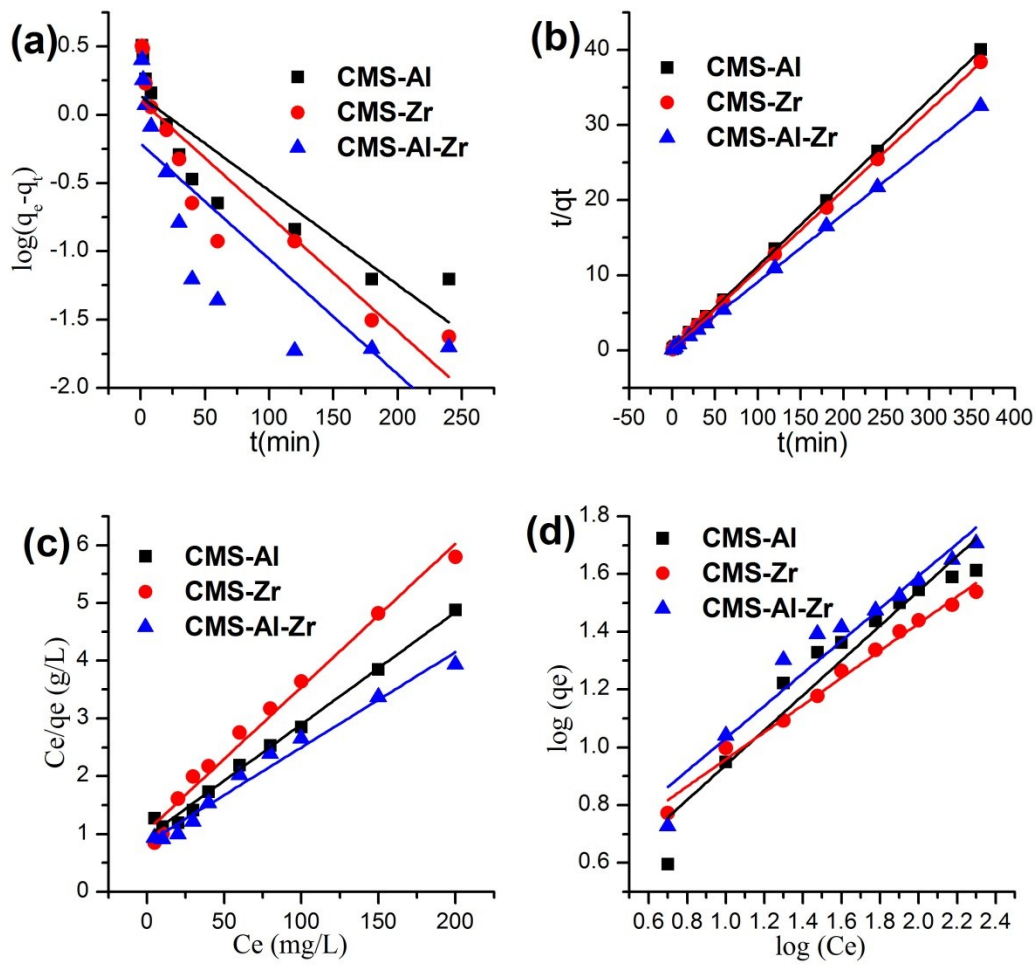

**Fig. S1.** The pseudo-first-order kinetic model (a), the pseudo-second-order kinetic model (b), the Langmuir isotherm (c) and the Freundlich isotherm (d) for fluoride adsorption on adsorbents.

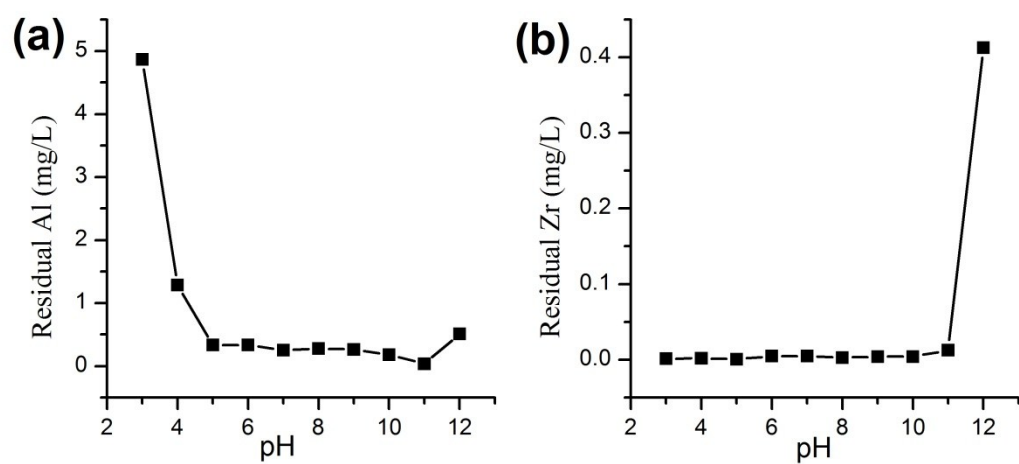

Fig. S2. Residual concentration of Al (a) and Zr (b) in solution with pH after adsorption by CMS-Al-Zr.

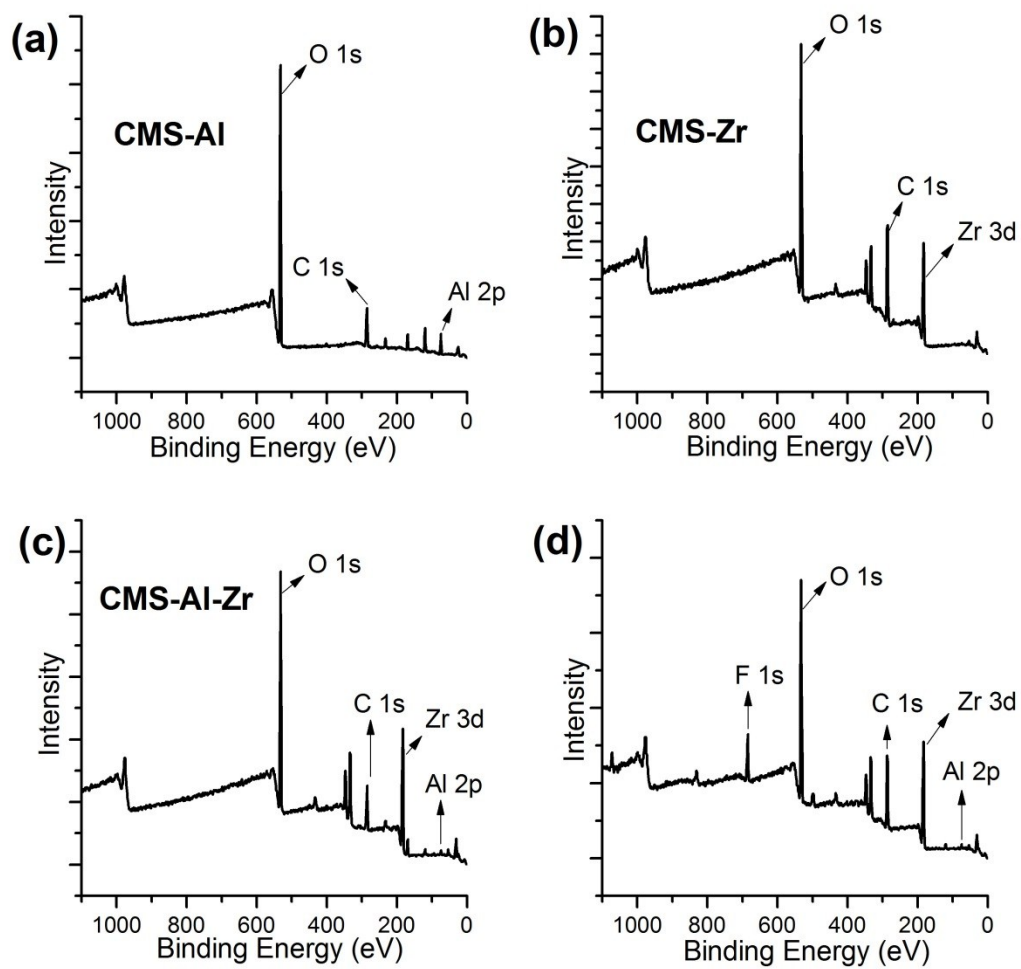

**Fig. S3.** XPS wide scan spectra of the adsorbents (a) CMS-Al, (b) CMS-Zr, (c) CMS-Al-Zr and (d) CMS-Al-Zr-F.

## References

1. Q. Liu, L. Zhang, B. Yang and R. Huang, *International journal of biological macromolecules*, 2015, **77**, 15-23.
2. J. Wang, X. Lin, X. Luo and W. Yao, *RSC Advances*, 2015, **5**, 59273-59285.
3. J. Wang, X. Lin, X. Luo and Y. Long, *Chemical Engineering Journal*, 2014, **252**, 415-422.
4. Q. Zhou, X. Lin, J. Qian, J. Wang and X. Luo, *Rsc Advances*, 2015, **5**, 2100-2112.
5. J. Ma, Y. Shen, C. Shen, Y. Wen and W. Liu, *Chemical Engineering Journal*, 2014, **248**, 98-106.
6. A. Teimouri, S. G. Nasab, S. Habibollahi, M. Fazel-Najafabadi and A. N. Chermahini, *RSC Advances*, 2015, **5**, 6771-6781.
7. I. Saha, A. Ghosh, D. Nandi, K. Gupta, D. Chatterjee and U. C. Ghosh, *Chemical Engineering Journal*, 2015, **263**, 220-230.
8. H. Paudyal, B. Pangen, K. Inoue, H. Kawakita, K. Ohto, K. N. Ghimire and S. Alam, *Bioresource Technology*, 2013, **148**, 221-227.
9. S. M. Prabhu and S. Meenakshi, *International journal of biological macromolecules*, 2015, **78**, 280-286.
10. J. Liu, W. Y. Li, Y. Liu, Q. Zeng and S. Hong, *Applied Surface Science*, 2014, **293**, 46-54.
11. S. M. Prabhu and S. Meenakshi, *Carbohydrate polymers*, 2015, **120**, 60-68.
12. M. G. Sujana, A. Mishra and B. C. Acharya, *Applied Surface Science*, 2013, **270**, 767-776.
13. K. Pandi and N. Viswanathan, *Carbohydrate polymers*, 2015, **118**, 242-249.
14. M. Barathi, A. S. K. Kumar and N. Rajesh, *Ultrasonics Sonochemistry*, 2014, **21**, 1090-1099.
15. C. Sairam Sundaram, N. Viswanathan and S. Meenakshi, *Bioresource technology*, 2008, **99**, 8226-8230.
16. K. Pandi and N. Viswanathan, *Carbohydrate Polymers*, 2014, **112**, 662-667.
17. D. Santra, R. Joarder and M. Sarkar, *Carbohydrate Polymers*, 2014, **111**, 813-821.
